# Supplementary material for: K-gradient doping to stabilize the spinel structure of Li1.6Mn1.6O4 for Li+ recovery
Source: Royal Society of Chemistry journal article supplement (doi:10.1039/d0dt02405h), 2020-01-01
Supplement: d0dt02405h1.pdf [file d0dt02405h1.pdf]

## K-Gradient Doping to Stabilize Spinel Structure of $\text{Li}_{1.6}\text{Mn}_{1.6}\text{O}_4$ for $\text{Li}^+$ recovery

Fangren Qian;<sup>[1, 2, 3]</sup> Bing Zhao;<sup>[1, 2, 3]</sup> Min Guo;<sup>[1, 2]</sup> Jun Li;<sup>[1, 2]</sup> Zhong Liu;<sup>\*[1, 2]</sup> Zhijian Wu<sup>[1, 2]</sup>

<sup>[1]</sup> Key Laboratory of Comprehensive and Highly Efficient Utilization of Salt Lake Resources, Qinghai Institute of Salt Lakes, Chinese Academy of Sciences, Xining 810008, China

<sup>[2]</sup> Key Laboratory of Salt Lake Resources Chemistry of Qinghai Province, Xining 810008, China

<sup>[3]</sup> University of Chinese Academy of Sciences, Beijing 100049, China

\*Corresponding author, E-mail address: liuzhong@isl.ac.cn

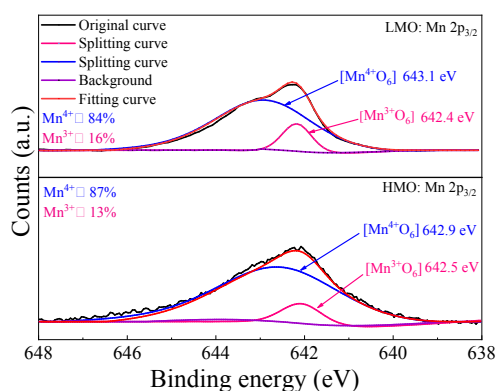

Fig. S1. The fitting curve of Mn 2p for undoped samples.

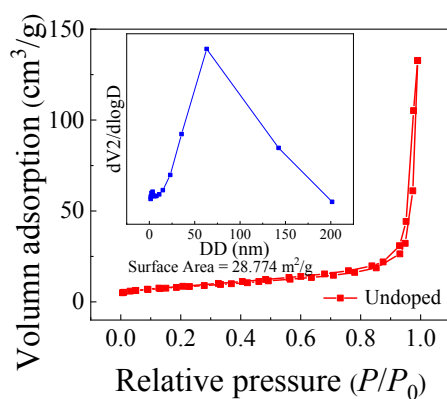

Fig. S2. Nitrogen ad/desorption isotherms and pore size distribution of HMO.

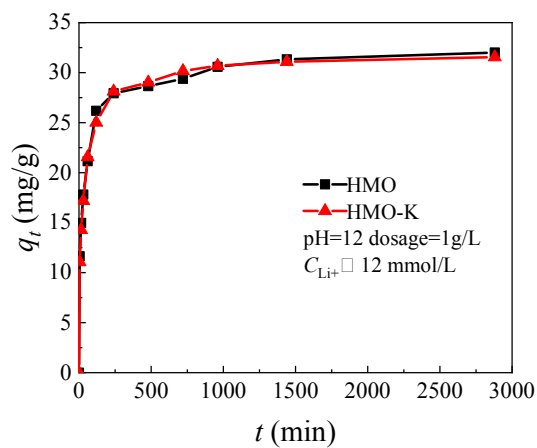

Fig. S3 The adsorption rate of HMO and HMO-K .

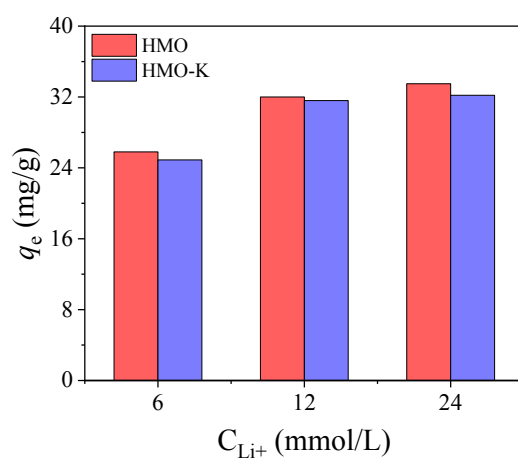

Fig. S4 Adsorption capacity of HMO and HMO-K at different initial  $Li^+$  concentration.

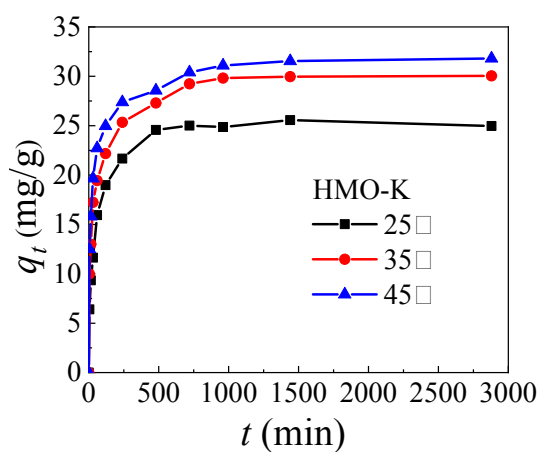

Fig. S5 Adsorption capacity of HMO-K at various temperature.

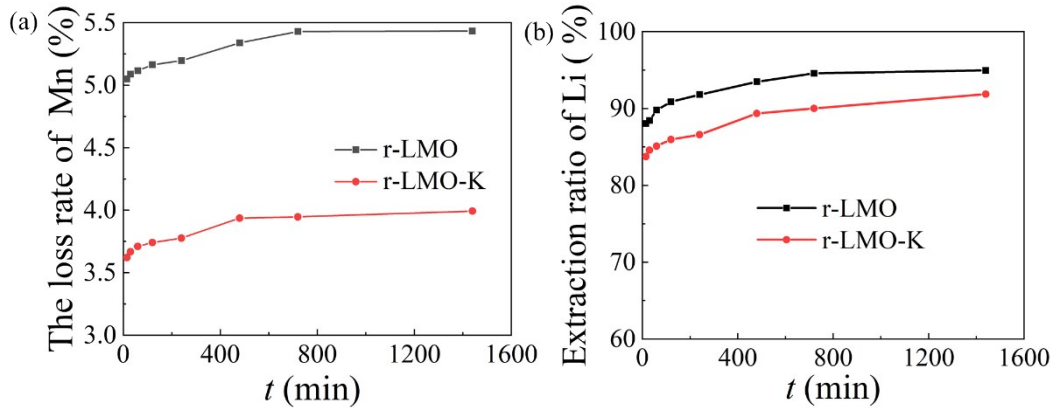

Fig. S6. (a) The Mn dissolution of r-LMO-K and r-LMO; (b)  $\text{Li}^+$  extract of r-LMO-K and r-LMO.

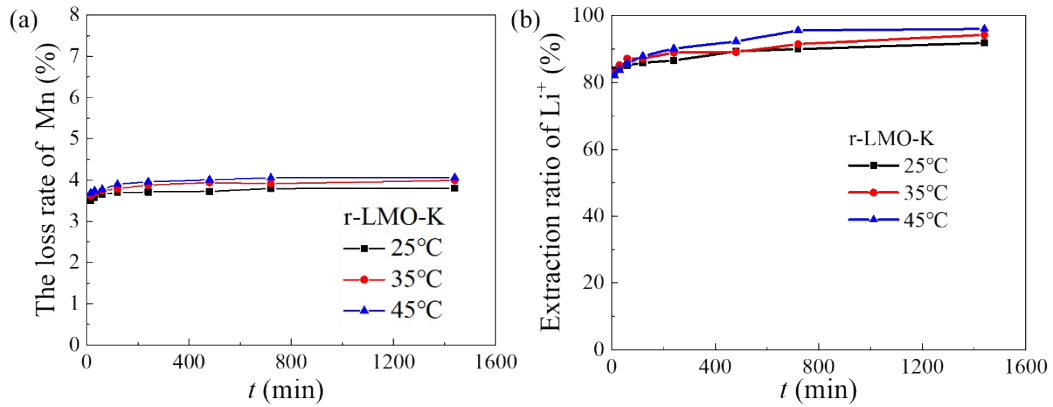

Fig. S7. The desorption properties in different temperature ( $C_{\text{HCl}} = 0.6 \text{ mol/L}$ ). (a) Dissolution of Mn and (b) desorption rate of  $\text{Li}^+$ .

## First principles calculations

Density functional theory (DFT) [1, 2] calculations were implemented by the Vienna Ab-initio Simulation Package (VASP) with the projector-augmented wave (PAW) [3] method, and the Perdew-Burke-Ernzerh (PBE) exchange-correlation functional [4] of the Generalized Gradient Approximation (GGA) [5-7]. Owing to the strong-correlation d-electrons of Mn metals, the Hubbard-type U correction was adopted. In order to gain accurate computation, the U values of 4.5 eV [8] were used. The cutoff energy of 500 eV was adopted in all calculations. The thickness of the vacuum is set to the 15 Å. An appropriate k-point mesh of  $6 \times 6 \times 6$  and  $3 \times 3 \times 1$  for Bulk and the  $\text{Li}_4\text{Mn}_5\text{O}_{12}$  (100) surface was adopted, respectively. In order to improve the quality of DOS and charge, the k-point mesh of  $4 \times 4 \times 1$  was adopted. The electronic total energies convergence criterion was set at  $10^{-4}$  eV. The atomic positions were stable until Hellmann-Feynman forces on each atom were less than a threshold value of 0.01 eV.

## References

- [1] P. Hohenberg, W. Kohn, Inhomogeneous Electron Gas, *Physical Review* 136 (1964) B864-B871.
- [2] W. Kohn, L.J. Sham, Self-Consistent Equations Including Exchange and Correlation Effects, *Physical Review* 140 (1965) A1133-A1138.
- [3] P.E. Blochl, Projector augmented-wave method, *Phys Rev B Condens Matter* 50 (1994) 17953-17979.
- [4] J.P. Perdew, K. Burke, M. Ernzerhof, Generalized Gradient Approximation Made Simple, *Physical Review Letters* 77 (1996) 3865-3868.
- [5] G. Kresse, J. Hafner, Ab initio molecular dynamics for liquid metals, *Phys Rev B Condens Matter* 47 (1993) 558-561.
- [6] G. Kresse, J. Furthmuller, Efficiency of ab-initio total energy calculations for metals and semiconductors using a plane-wave basis set, *Computational Materials Science* 6 (1996) 15-50.
- [7] G. Kresse, D. Joubert, From ultrasoft pseudopotentials to the projector augmented-wave method, *Physical Review B* 59 (1999) 1758-1775.
- [8] F. Zhou, M. Cococcioni, C.A. Marianetti, D. Morgan, G. Ceder, First-principles prediction of redox potentials in transition-metal compounds with LDA+U, *Physical Review B* 70 (2004) 1-8.
